# Supplementary material for: Natural and molecular history of prolactinoma: insights from a Prlr –/– mouse model
Source: PubMed Central journal article supplement (PMC5814201; doi:10.18632/oncotarget.23713), 2017-12-27
Supplement: oncotarget-09-6144-s001.pdf [file oncotarget-09-6144-s001.pdf]

## Natural and molecular history of prolactinoma: insights from a *Prlr*<sup>-/-</sup> mouse model

### SUPPLEMENTARY MATERIALS

**Supplementary Table 1: List of 218 genes displaying concordant variations in mouse at rat prolactinoma models.** See Supplementary\_Table\_1
